# Supplementary material for: A new monohydrated molecular salt of GABA with l-tartaric acid: the structure-forming role of water
Source: Royal Society of Chemistry journal article supplement (doi:10.1039/d1ce00470k), 2021-01-01
Supplement: d1ce00470k10.pdf [file d1ce00470k10.pdf]

## Supplementary information

Table S1. Crystal data and detail of experimental data collection and refinement for a monohydrated molecular salt of GABA and L-tartaric acid

| GABA L-tartaric acid monohydrate                                                                               |                                                                                                                                                                                                                                                                            |
|----------------------------------------------------------------------------------------------------------------|----------------------------------------------------------------------------------------------------------------------------------------------------------------------------------------------------------------------------------------------------------------------------|
| Crystal data                                                                                                   |                                                                                                                                                                                                                                                                            |
| Chemical formula                                                                                               | C <sub>4</sub> H <sub>5</sub> O <sub>6</sub> ·C <sub>4</sub> H <sub>10</sub> NO <sub>2</sub> ·H <sub>2</sub> O                                                                                                                                                             |
| <i>M<sub>r</sub></i>                                                                                           | 271.22                                                                                                                                                                                                                                                                     |
| Crystal system, space group                                                                                    | Monoclinic, <i>P</i> 2 <sub>1</sub>                                                                                                                                                                                                                                        |
| Temperature (K)                                                                                                | 293                                                                                                                                                                                                                                                                        |
| <i>a</i> , <i>b</i> , <i>c</i> (Å)                                                                             | 6.1846 (2), 27.8403 (8), 7.4558 (2)                                                                                                                                                                                                                                        |
| $\mu$ (°)                                                                                                      | 109.007 (3)                                                                                                                                                                                                                                                                |
| <i>V</i> (Å <sup>3</sup> )                                                                                     | 1213.76 (7)                                                                                                                                                                                                                                                                |
| <i>Z</i>                                                                                                       | 4                                                                                                                                                                                                                                                                          |
| Radiation type                                                                                                 | Mo <i>K</i> $\alpha$                                                                                                                                                                                                                                                       |
| $\mu$ (mm <sup>-1</sup> )                                                                                      | 0.14                                                                                                                                                                                                                                                                       |
| Crystal size (mm)                                                                                              | 0.45 × 0.18 × 0.03                                                                                                                                                                                                                                                         |
| Data collection                                                                                                |                                                                                                                                                                                                                                                                            |
| Diffractometer                                                                                                 | Xcalibur, Ruby, Gemini ultra                                                                                                                                                                                                                                               |
| Absorption correction                                                                                          | Multi-scan<br><i>CrysAlis PRO</i> , Agilent Technologies, Version 1.171.37.35 (release 13-08-2014<br><i>CrysAlis171 .NET</i> ) (compiled Aug 13 2014,18:06:01) Empirical absorption correction using spherical harmonics, implemented in SCALE3 ABSPACK scaling algorithm. |
| <i>T<sub>min</sub></i> , <i>T<sub>max</sub></i>                                                                | 0.919, 1.000                                                                                                                                                                                                                                                               |
| No. of measured, independent and observed [ <i>I</i> > 2σ( <i>I</i> )] reflections                             | 15413, 4952, 4034                                                                                                                                                                                                                                                          |
| <i>R<sub>int</sub></i>                                                                                         | 0.043                                                                                                                                                                                                                                                                      |
| (sin $\Theta/\lambda$ ) <sub>max</sub> (Å <sup>-1</sup> )                                                      | 0.625                                                                                                                                                                                                                                                                      |
| Refinement                                                                                                     |                                                                                                                                                                                                                                                                            |
| <i>R</i> [ <i>F</i> <sup>2</sup> > 2σ( <i>F</i> <sup>2</sup> )], <i>wR</i> ( <i>F</i> <sup>2</sup> ), <i>S</i> | 0.048, 0.100, 1.02                                                                                                                                                                                                                                                         |
| No. of reflections                                                                                             | 4952                                                                                                                                                                                                                                                                       |
| No. of parameters                                                                                              | 341                                                                                                                                                                                                                                                                        |
| No. of restraints                                                                                              | 1                                                                                                                                                                                                                                                                          |
| H-atom treatment                                                                                               | H-atom parameters constrained                                                                                                                                                                                                                                              |
| $\Delta\rho_{\text{max}}$ , $\Delta\rho_{\text{min}}$ (e Å <sup>-3</sup> )                                     | 0.48, -0.32                                                                                                                                                                                                                                                                |

Table S2. Selected hydrogen-bond parameters

| <i>D</i> —H··· <i>A</i>       | <i>D</i> —H (Å) | H··· <i>A</i> (Å) | <i>D</i> ··· <i>A</i> (Å) | <i>D</i> —H··· <i>A</i> (°) |
|-------------------------------|-----------------|-------------------|---------------------------|-----------------------------|
| O12—H12···O16 <sup>i</sup>    | 0.82            | 1.69              | 2.509 (4)                 | 177.0                       |
| O13—H13···O26                 | 0.82            | 2.06              | 2.768 (4)                 | 144.6                       |
| O14—H14···O11 <sup>ii</sup>   | 0.82            | 2.19              | 2.819 (4)                 | 133.7                       |
| O21—H21···O26 <sup>i</sup>    | 0.82            | 1.82              | 2.633 (4)                 | 169.4                       |
| N11—H11A···O15                | 0.89            | 1.88              | 2.749 (4)                 | 165.5                       |
| N11—H11B···O16 <sup>ii</sup>  | 0.89            | 1.89              | 2.779 (4)                 | 177.5                       |
| N11—H11C···O14 <sup>iii</sup> | 0.89            | 1.95              | 2.827 (4)                 | 166.2                       |
| N12—H12A···O25                | 0.89            | 1.92              | 2.789 (4)                 | 163.8                       |

|                               |      |      |           |       |
|-------------------------------|------|------|-----------|-------|
| N12—H12B···O24 <sup>iii</sup> | 0.89 | 1.97 | 2.856 (4) | 170.8 |
| O27—H27···O1 <sup>iv</sup>    | 0.82 | 1.85 | 2.667 (5) | 173.2 |
| O17—H17···O2 <sup>v</sup>     | 0.82 | 1.79 | 2.601 (6) | 171.7 |
| O1—H1A···O18 <sup>vi</sup>    | 0.85 | 1.98 | 2.824 (6) | 170.1 |
| O1—H1B···O11 <sup>ii</sup>    | 0.85 | 2.01 | 2.833 (4) | 162.5 |
| O2—H2A···O28                  | 0.85 | 2.01 | 2.824 (6) | 161.0 |
| O2—H2B···O22 <sup>iii</sup>   | 0.85 | 2.35 | 3.002 (5) | 134.3 |
| O2—H2B···O23 <sup>iii</sup>   | 0.85 | 2.09 | 2.864 (5) | 150.9 |
| O23—H23A···N12 <sup>vii</sup> | 0.82 | 2.52 | 3.014 (5) | 120.2 |

Symmetry code(s): (i)  $x, y, z-1$ ; (ii)  $x-1, y, z$ ; (iii)  $x, y, z+1$ ; (iv)  $-x+1, y-1/2, -z+1$ ; (v)  $-x+2, y+1/2, -z+2$ ; (vi)  $x-1, y, z-1$ ; (vii)  $x+1, y, z$ .

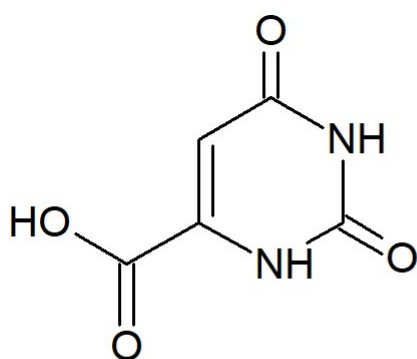

a

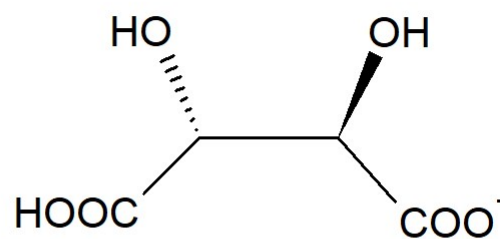

b

Scheme S1. Orotic and L-tartaric acids

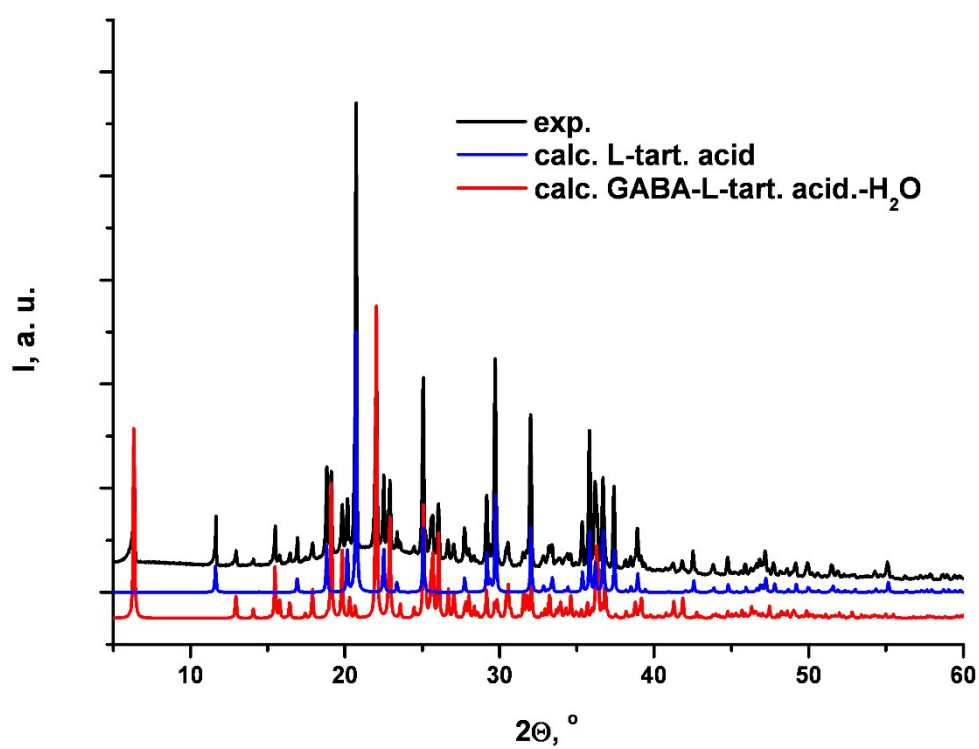

Fig. S1. Manual liquid-assisted grinding of equimolar amounts of GABA, L-tartaric acid and water by mortar and pestle. Experimental XRPD pattern shown black; theoretically calculated XRPD patterns for L-tartaric acid and hydrated salt of GABA with L-tartaric acid are put in blue and red, respectively.

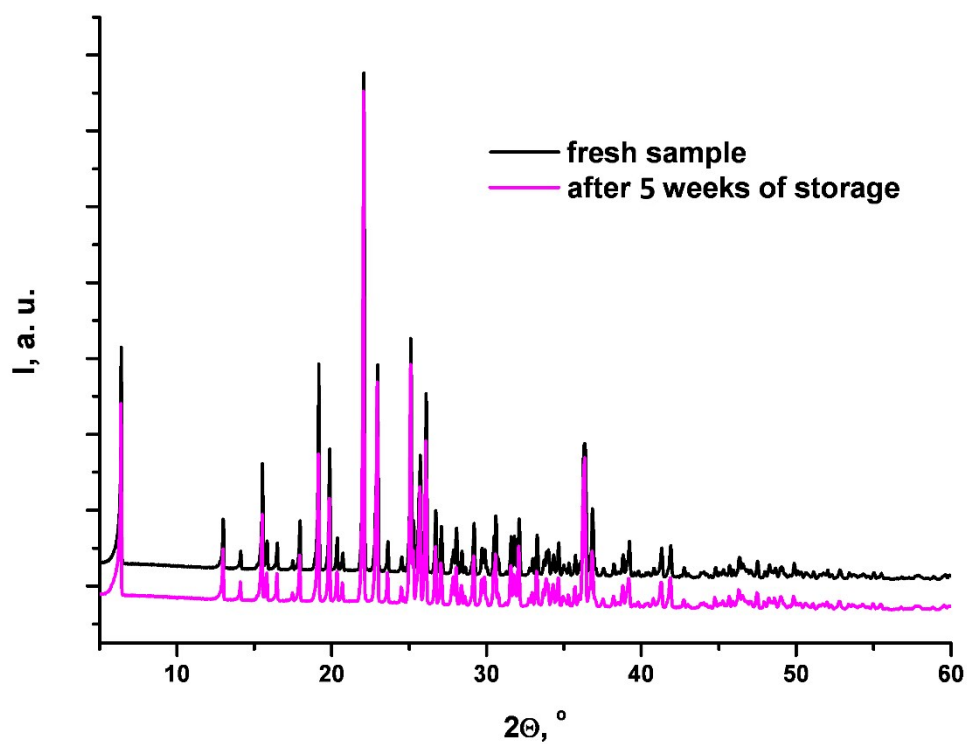

Fig. S2. Results of storage experiments of the hydrated molecular salt during 2 weeks. XRPD patterns of initial powder and the same sample after 5 weeks of storage in open vial are shown in black and magenta, respectively. There is no evidence of dehydration.

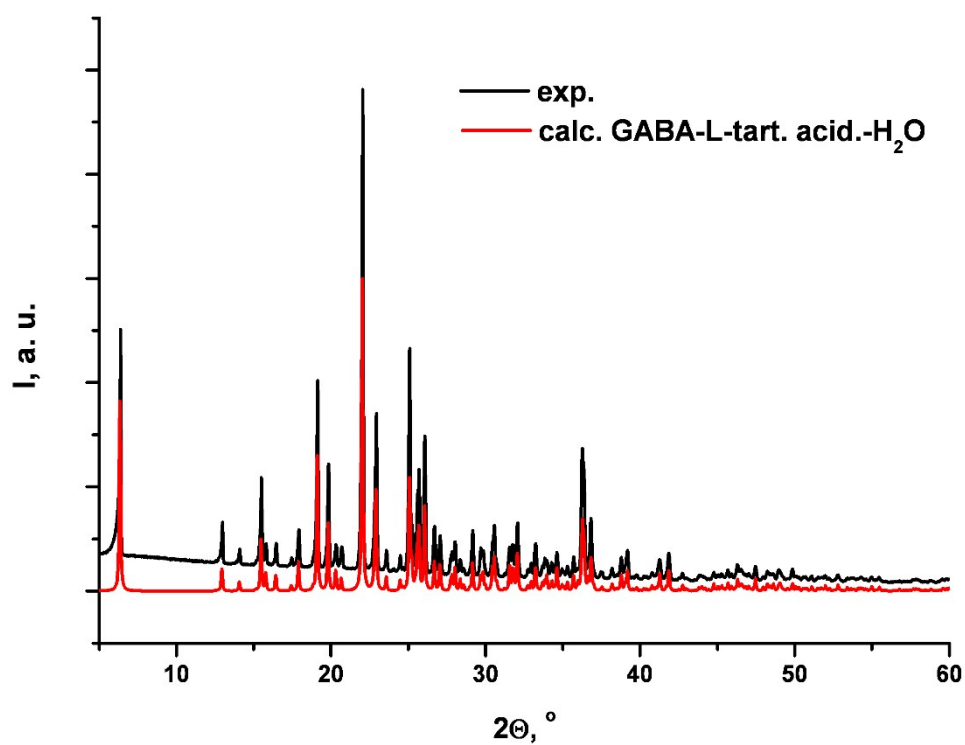

Fig. S3. Intense manual grinding of the hydrated molecular salt of GABA with L-tartaric acid (black). Theoretically calculated XRPD patterns of the hydrated salt shown red. Stability of the compound is demonstrated.

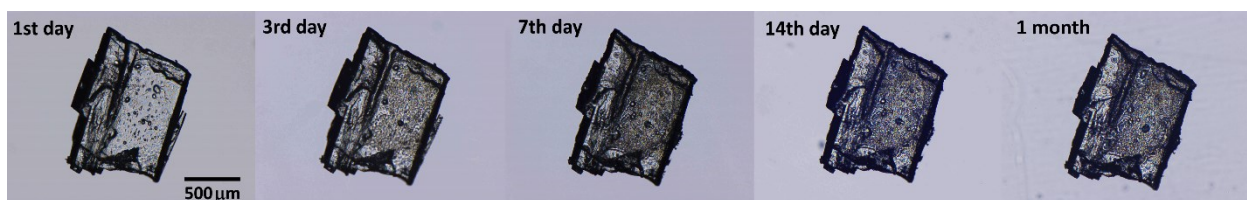

Fig. S4. A single crystal of the hydrated molecular salt of GABA with L-tartaric acid on storage on air during 1 month. No dehydration was observed (see results of phase analysis by XRPD). Some visual turbidity of the crystal after several days of storage is common for any freshly prepared crystal.

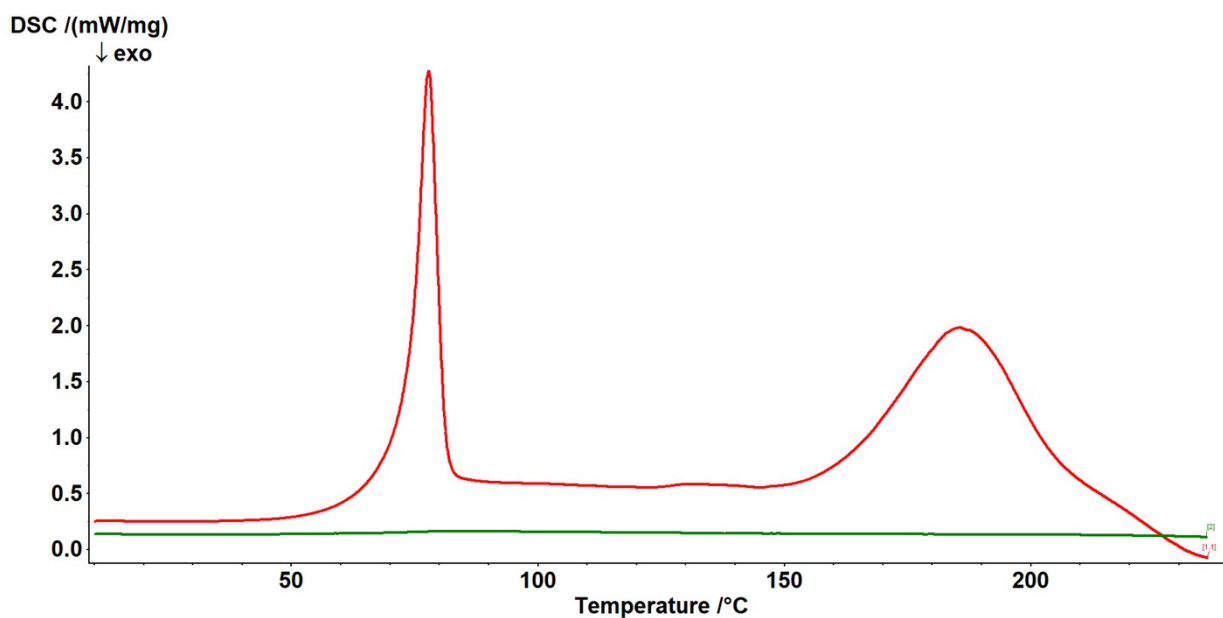

Fig. S5. Results of DSC experiments with hydrated molecular salt of GABA with L-tartaric acid in an open crucible. First heating run: red line. Second heating run: green line.

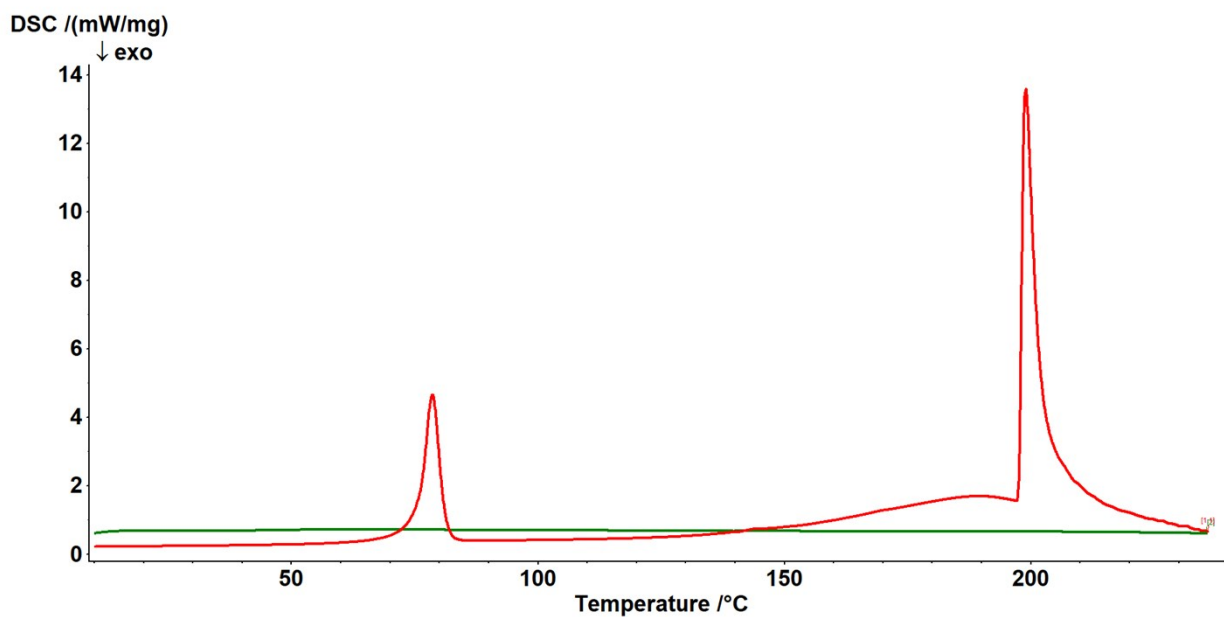

Fig. S6. Results of the DSC experiments with the hydrated molecular salt of GABA with L-tartaric acid in a closed crucible. First heating run: red line. Second heating run: green line.

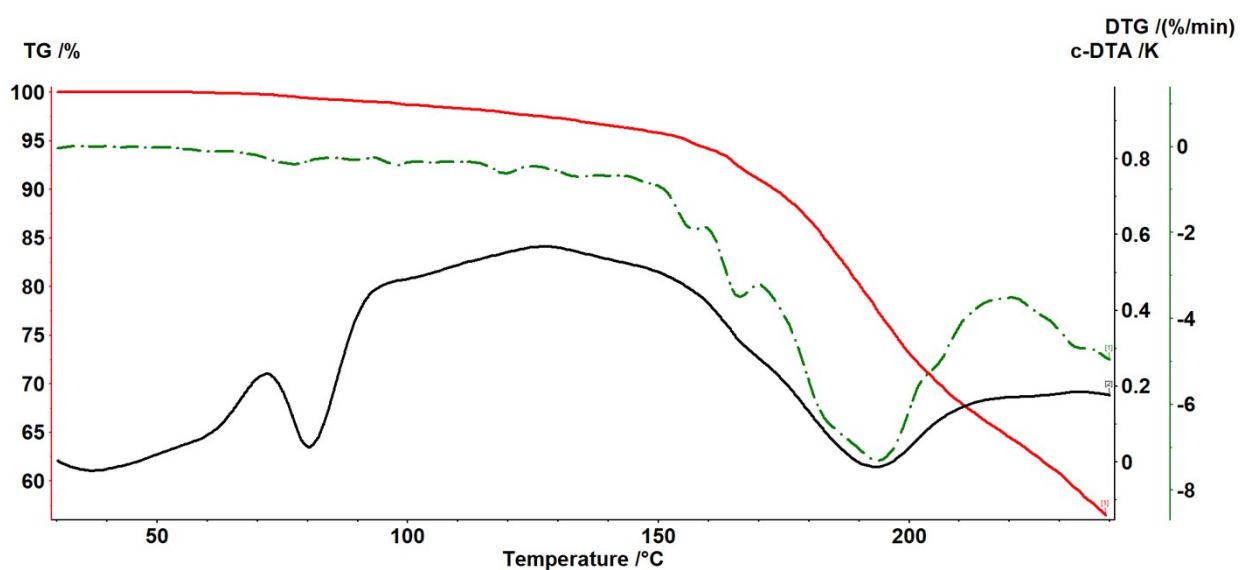

Fig. S7. Results of the TG experiments with the hydrated molecular salt of GABA with L-tartaric acid. Total mass, % : red line. Derivative of mass loss, %/min: green dashed line. C-DTA, K: black line.
