# Supplementary figures and images for: A new monohydrated molecular salt of GABA with l-tartaric acid: the structure-forming role of water
Source: Royal Society of Chemistry journal article supplement (doi:10.1039/d1ce00470k), 2021-01-01

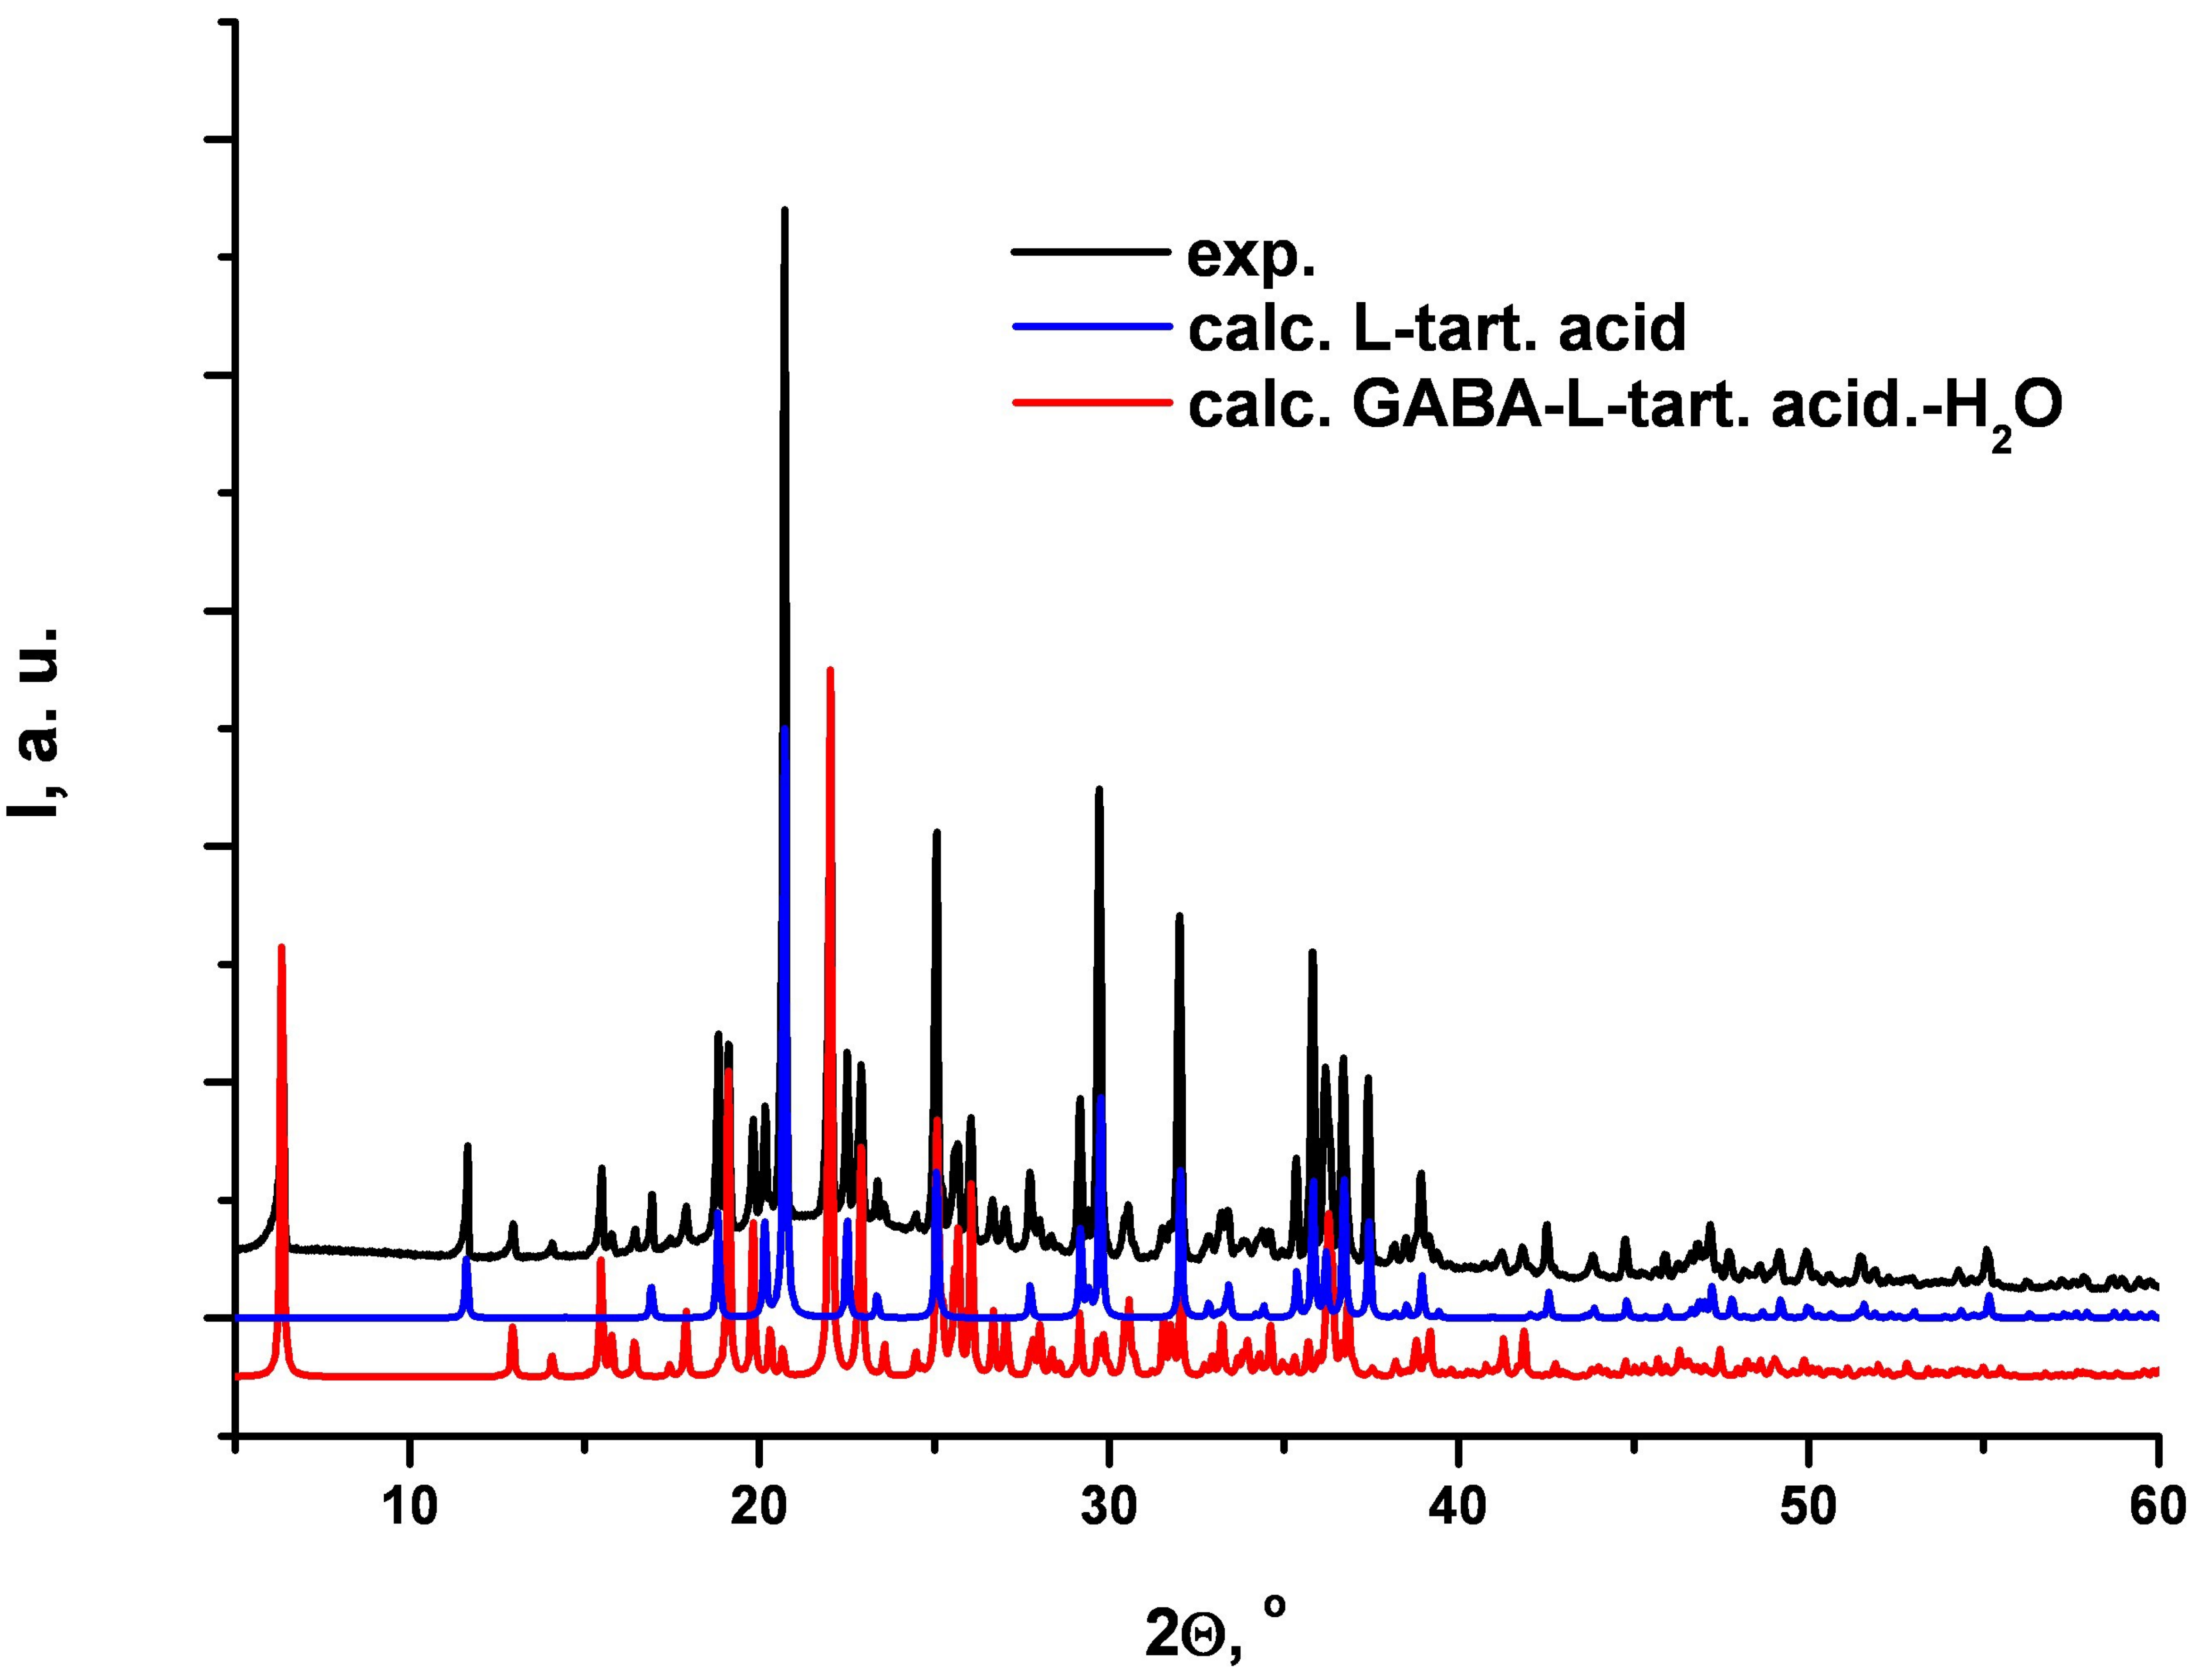

Supplement: d1ce00470k2.pdf [file d1ce00470k2.pdf]

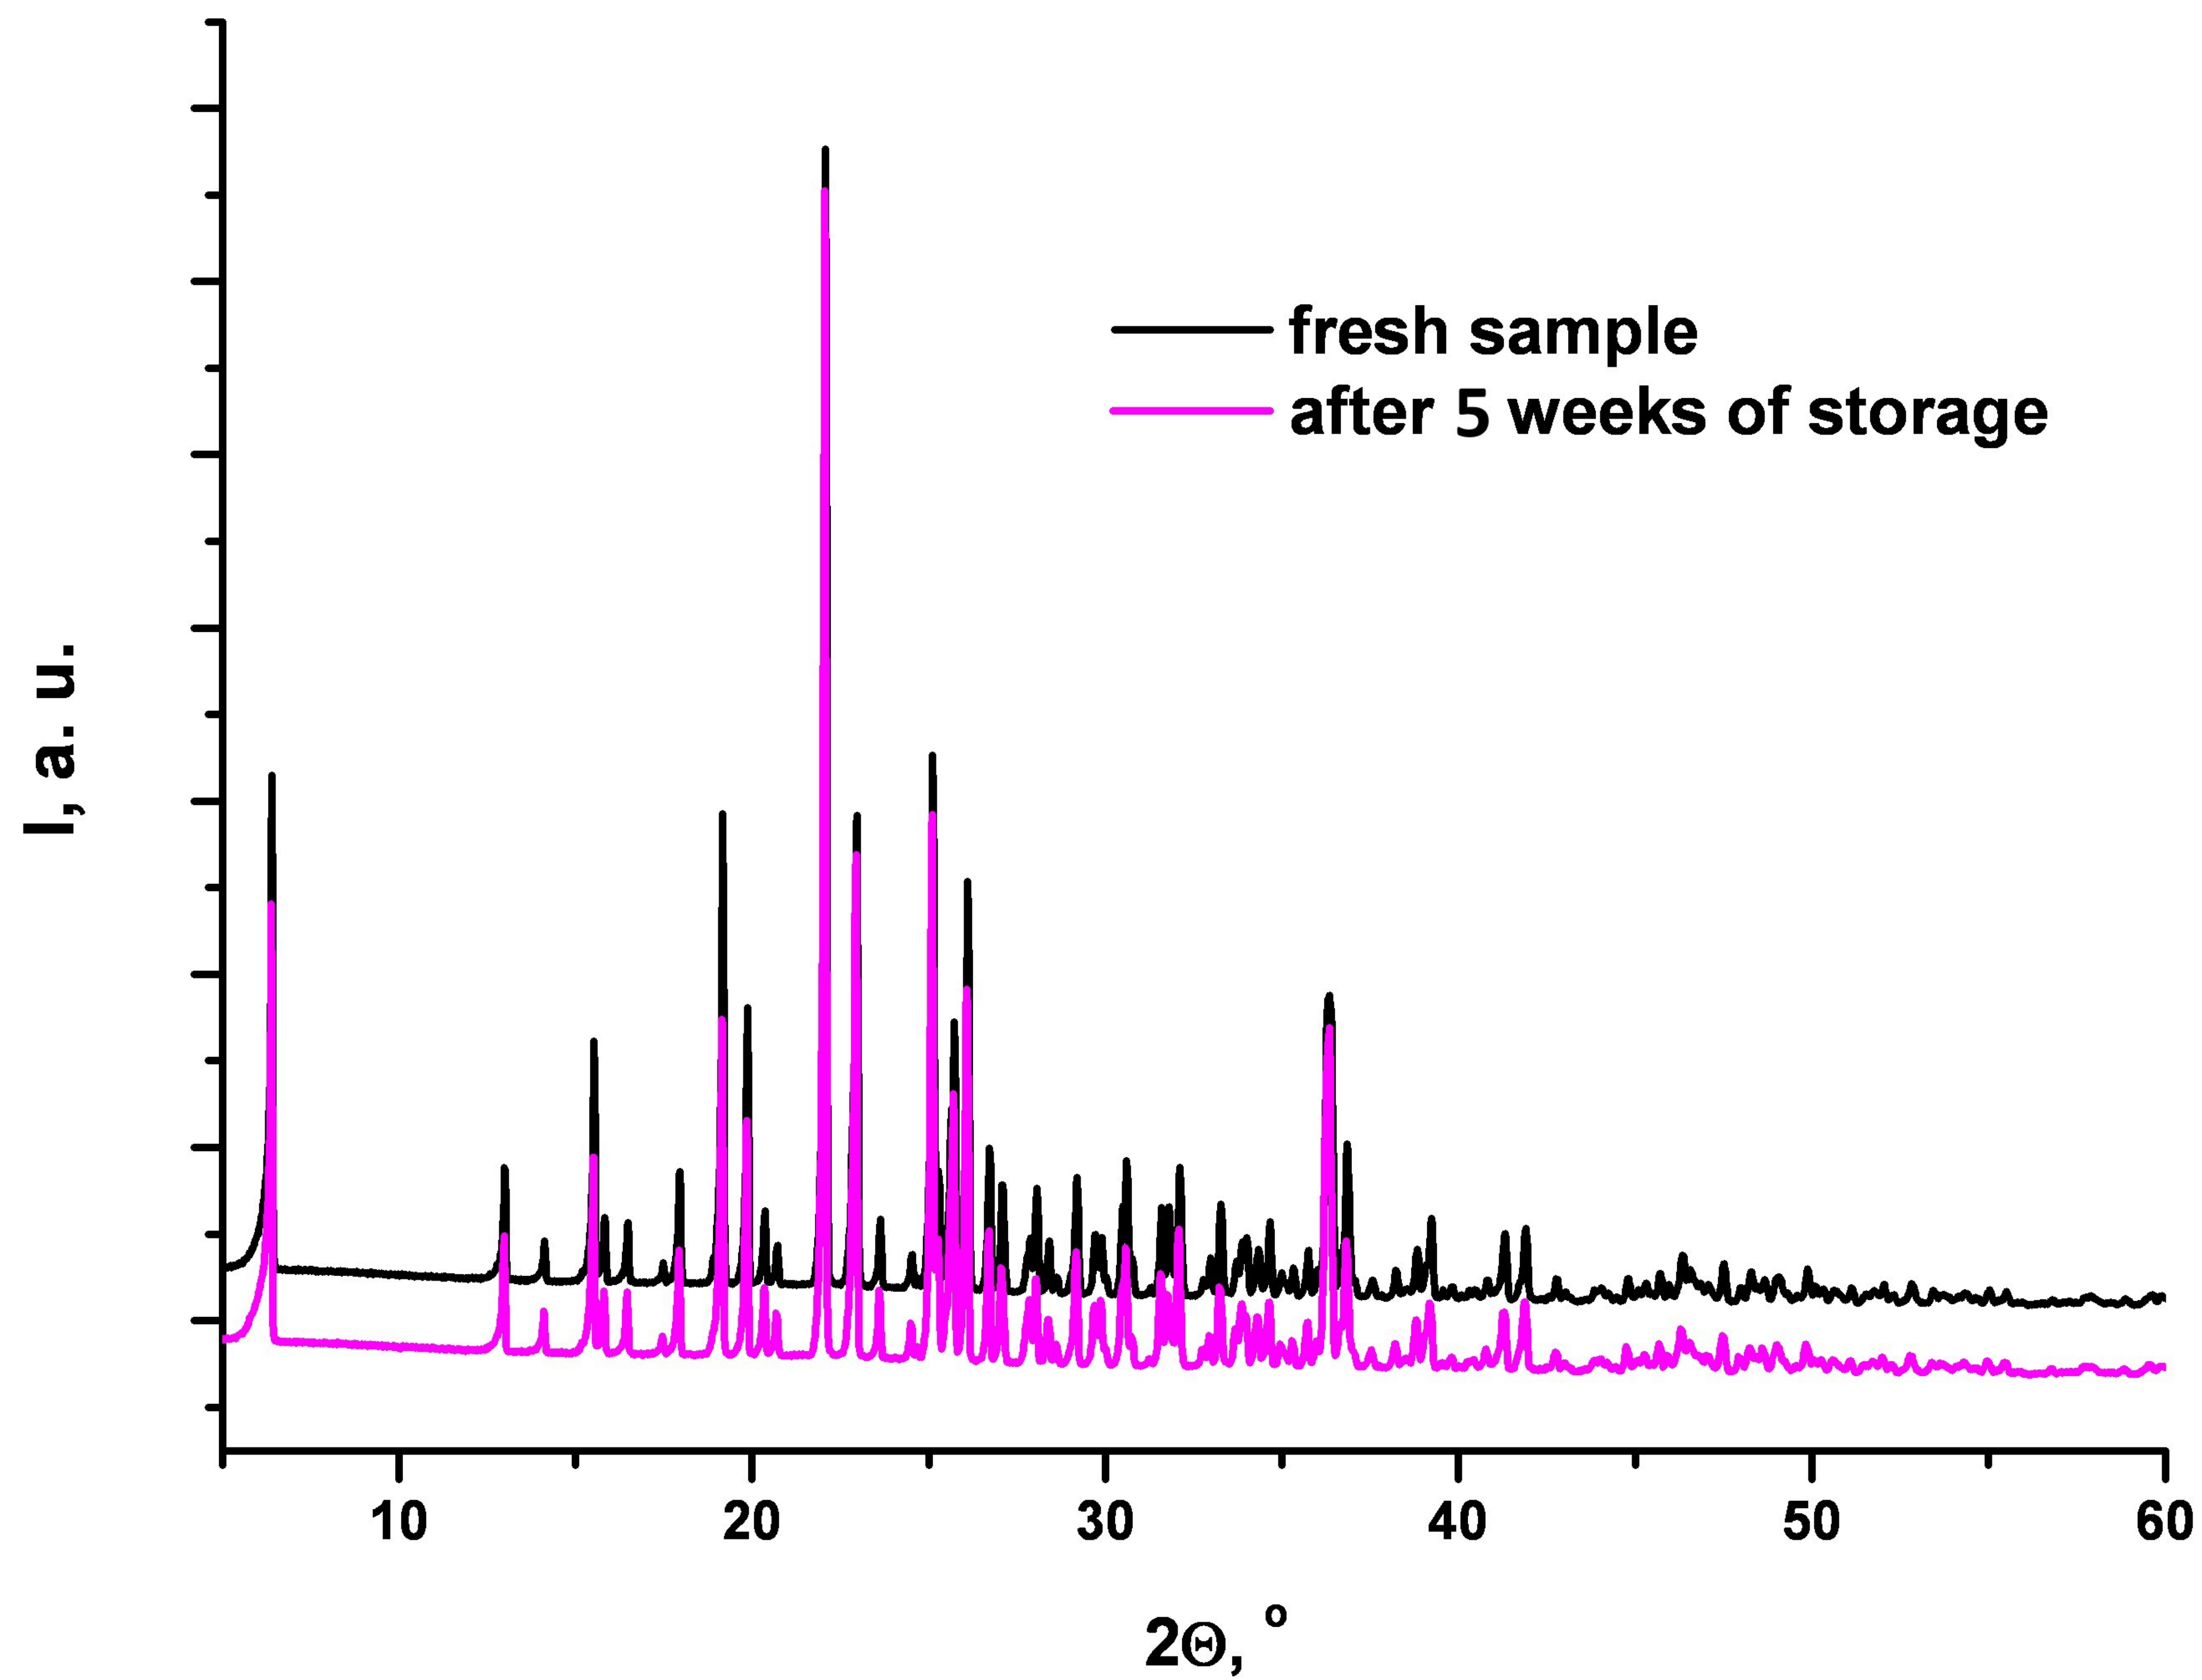

Supplement: d1ce00470k3.pdf [file d1ce00470k3.pdf]

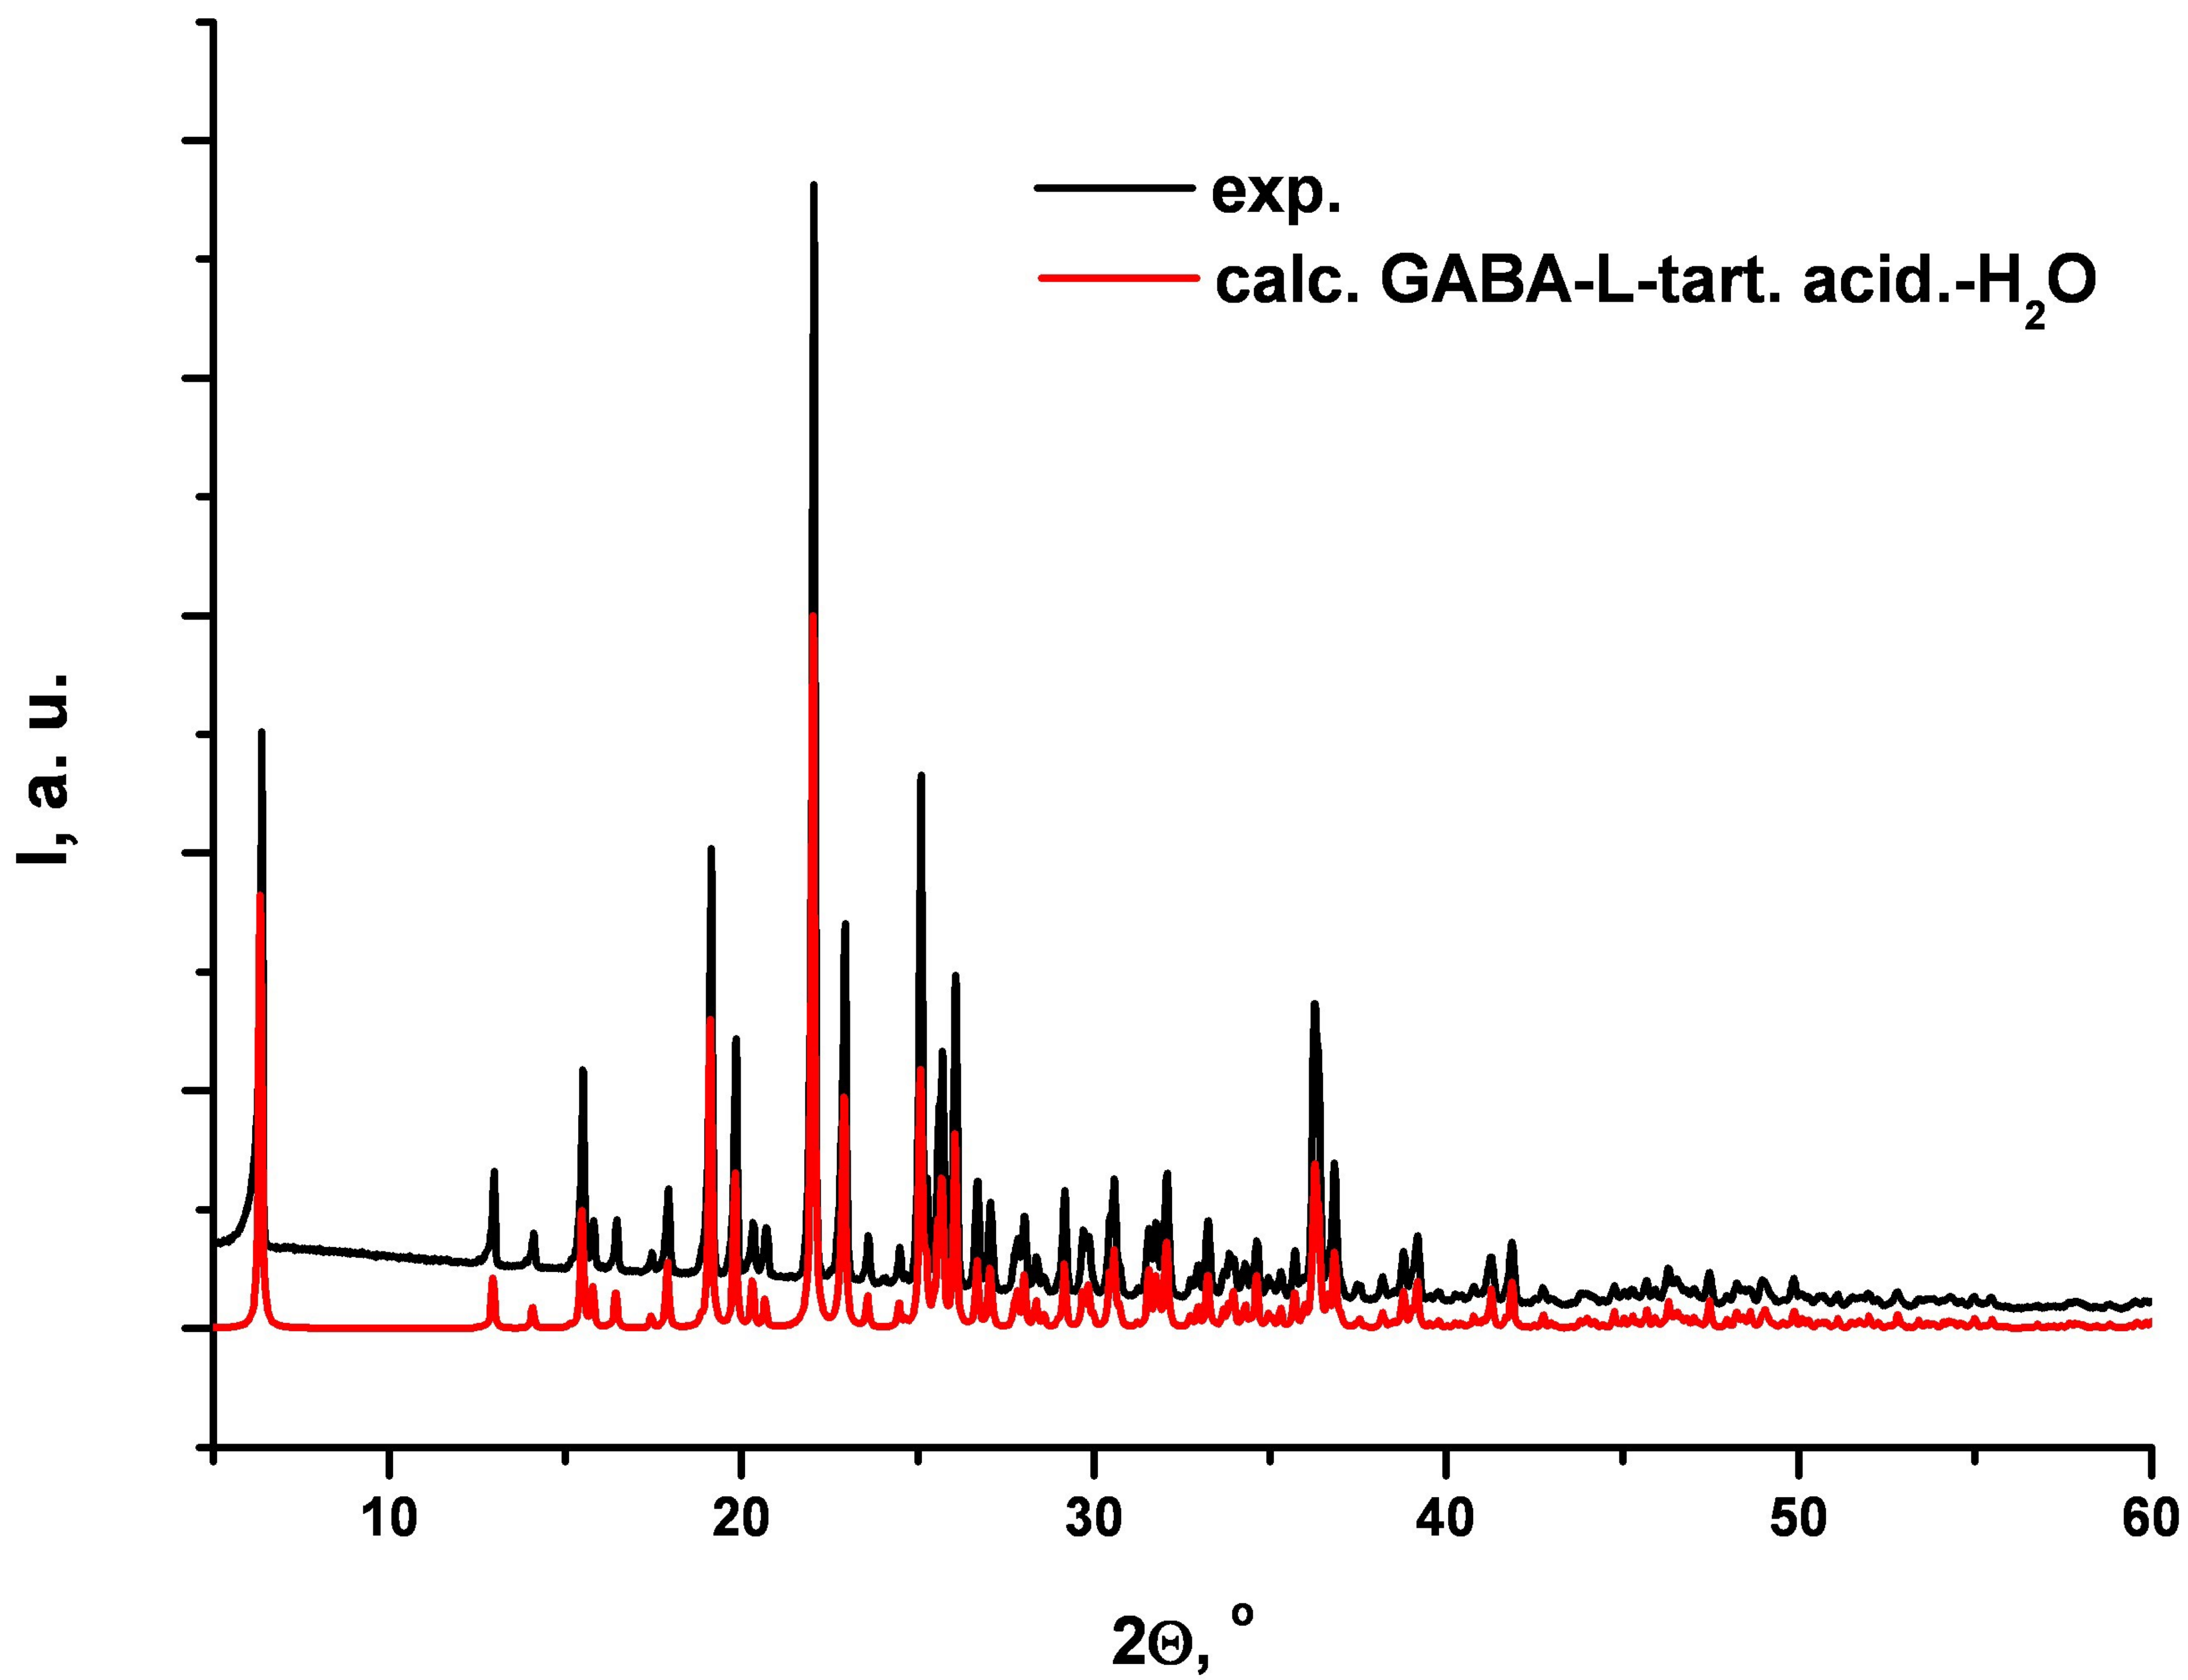

Supplement: d1ce00470k4.pdf [file d1ce00470k4.pdf]

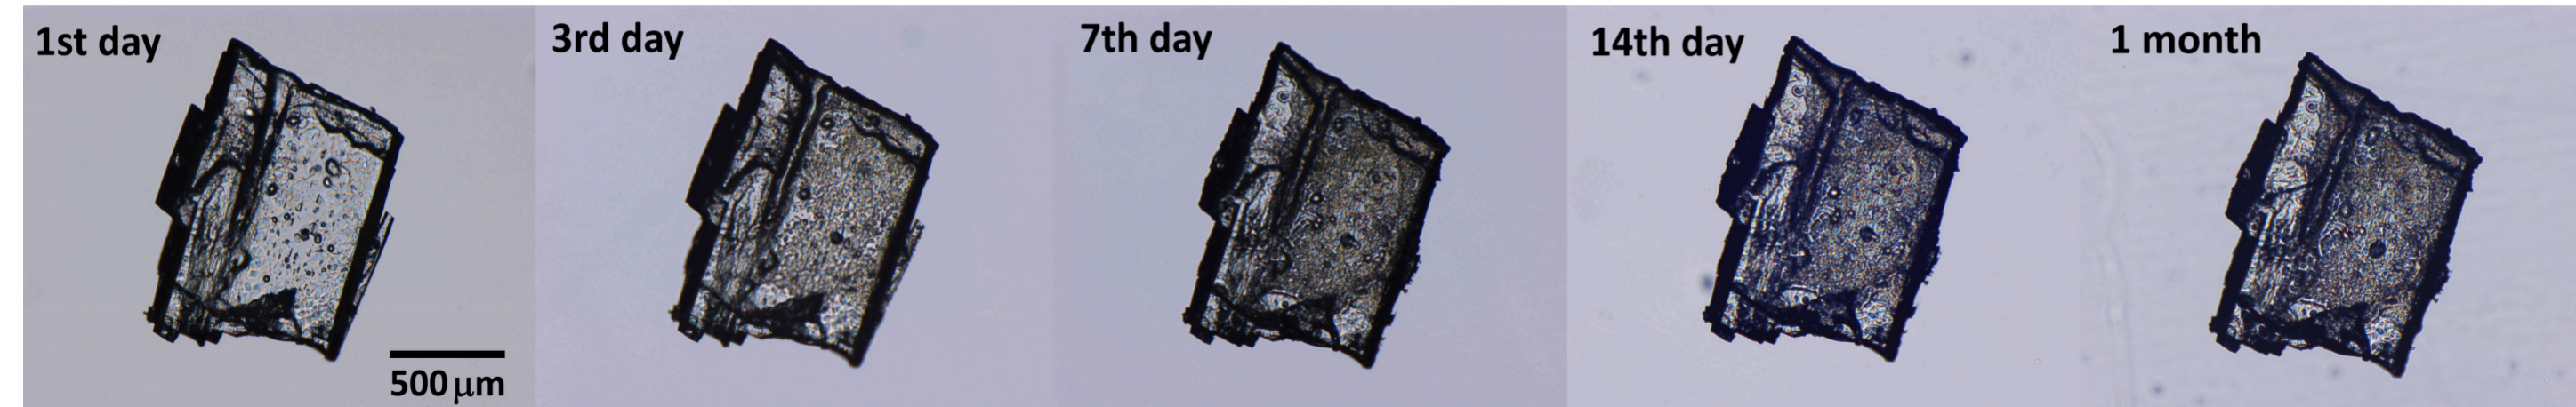

Supplement: d1ce00470k5.pdf [file d1ce00470k5.pdf]

DSC / (mW/mg)

↓ exo

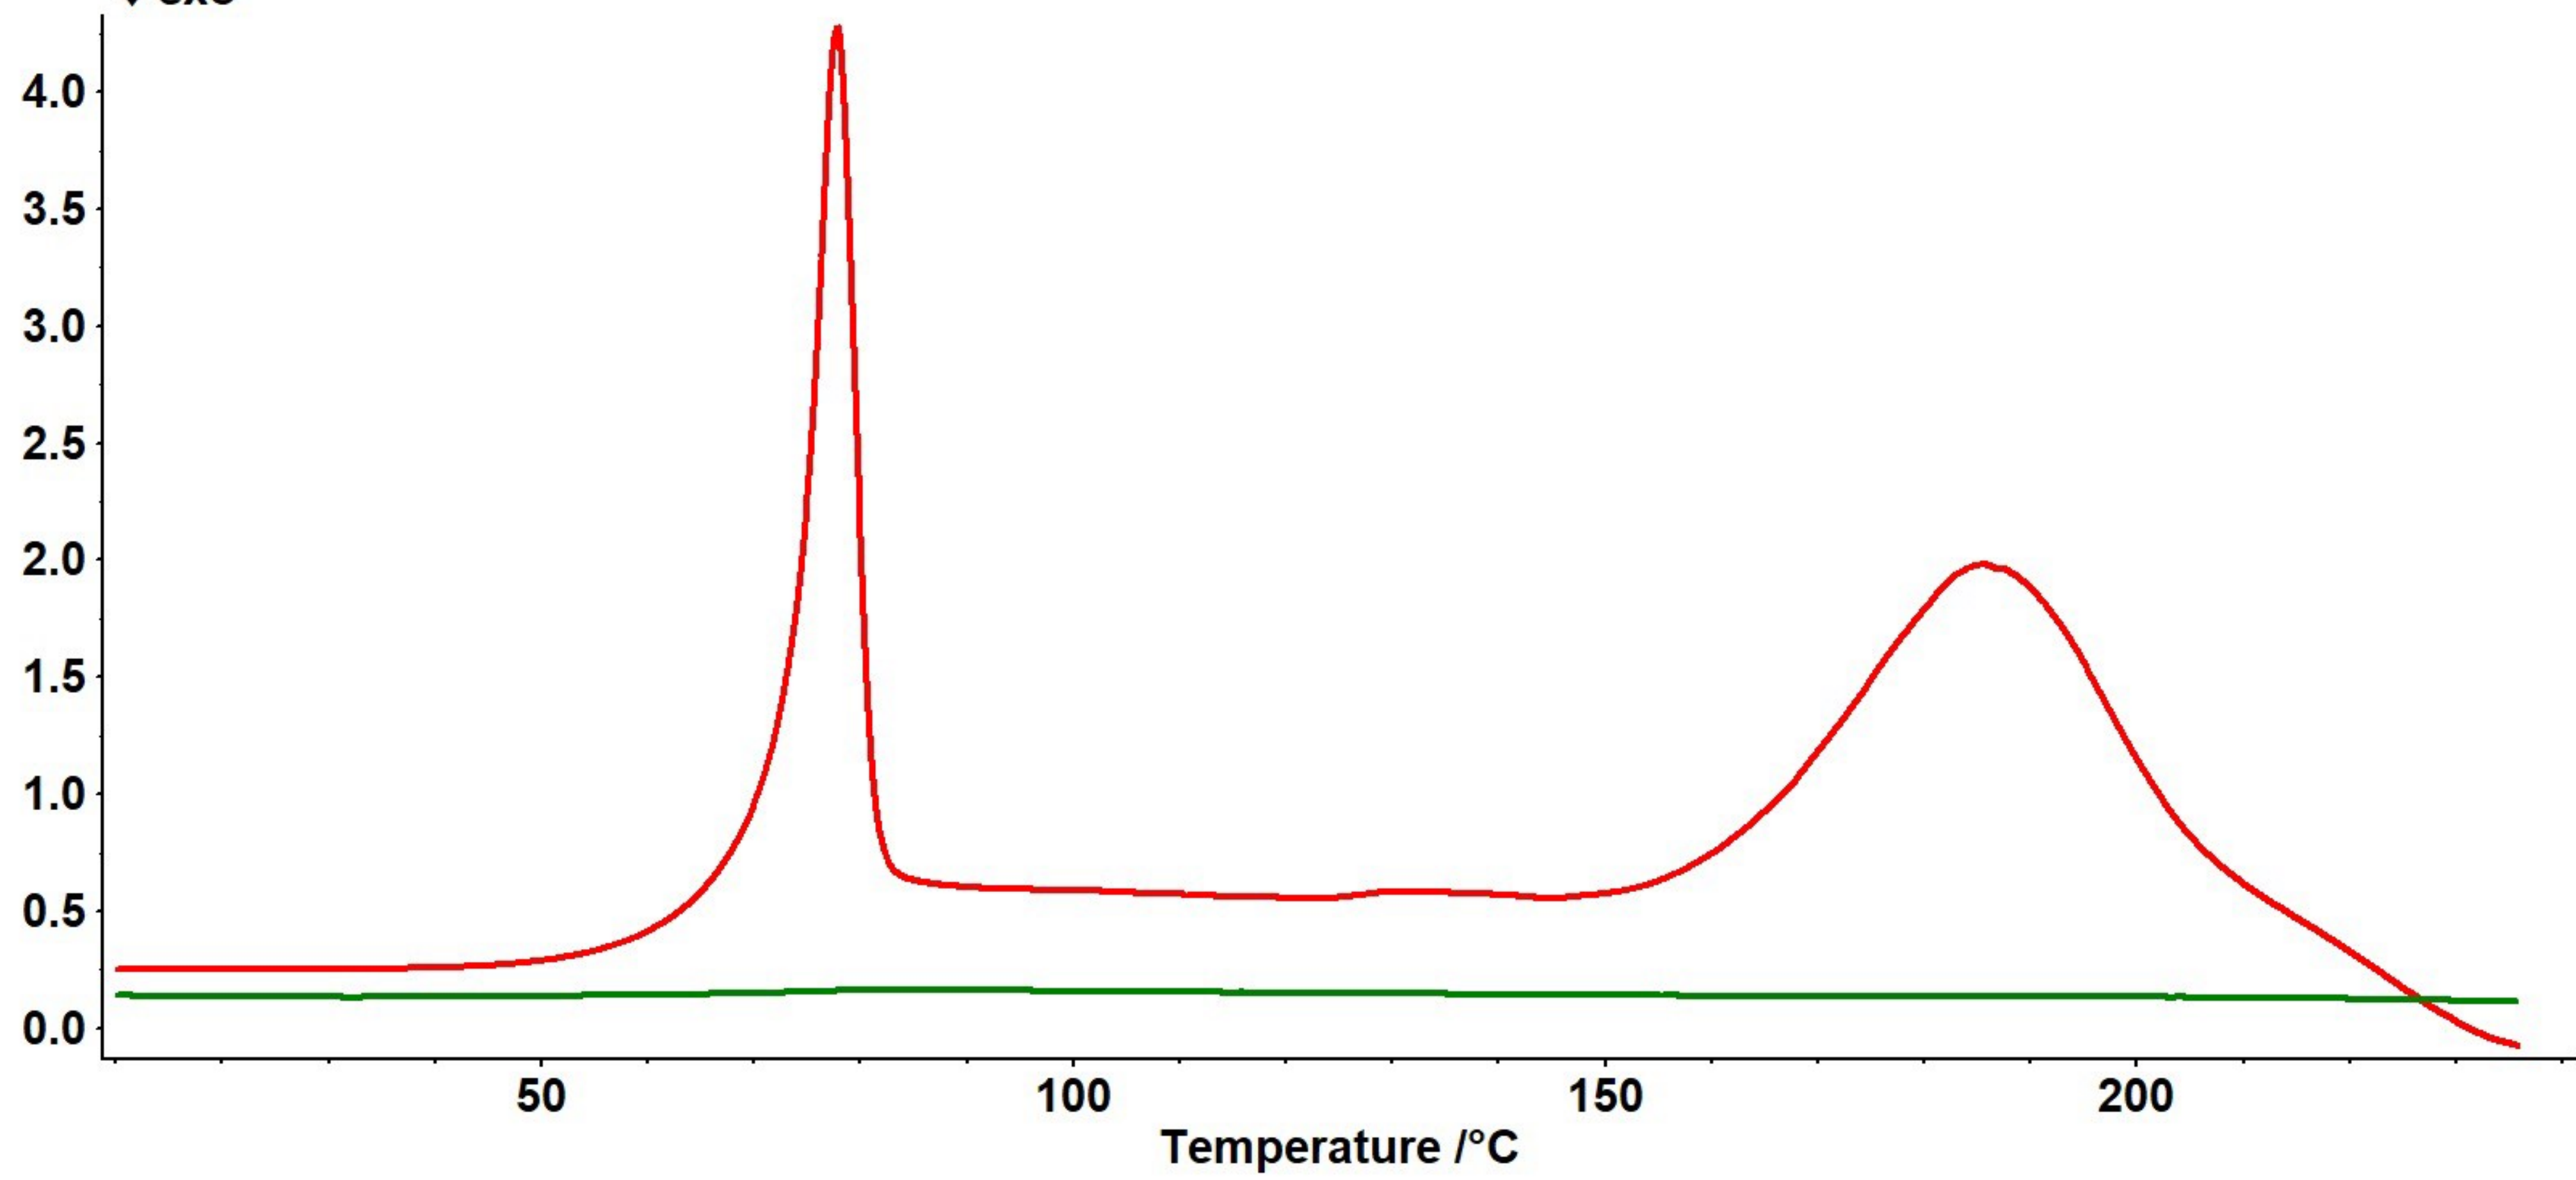

Supplement: d1ce00470k6.pdf [file d1ce00470k6.pdf]

DSC /(mW/mg)

↓ exo

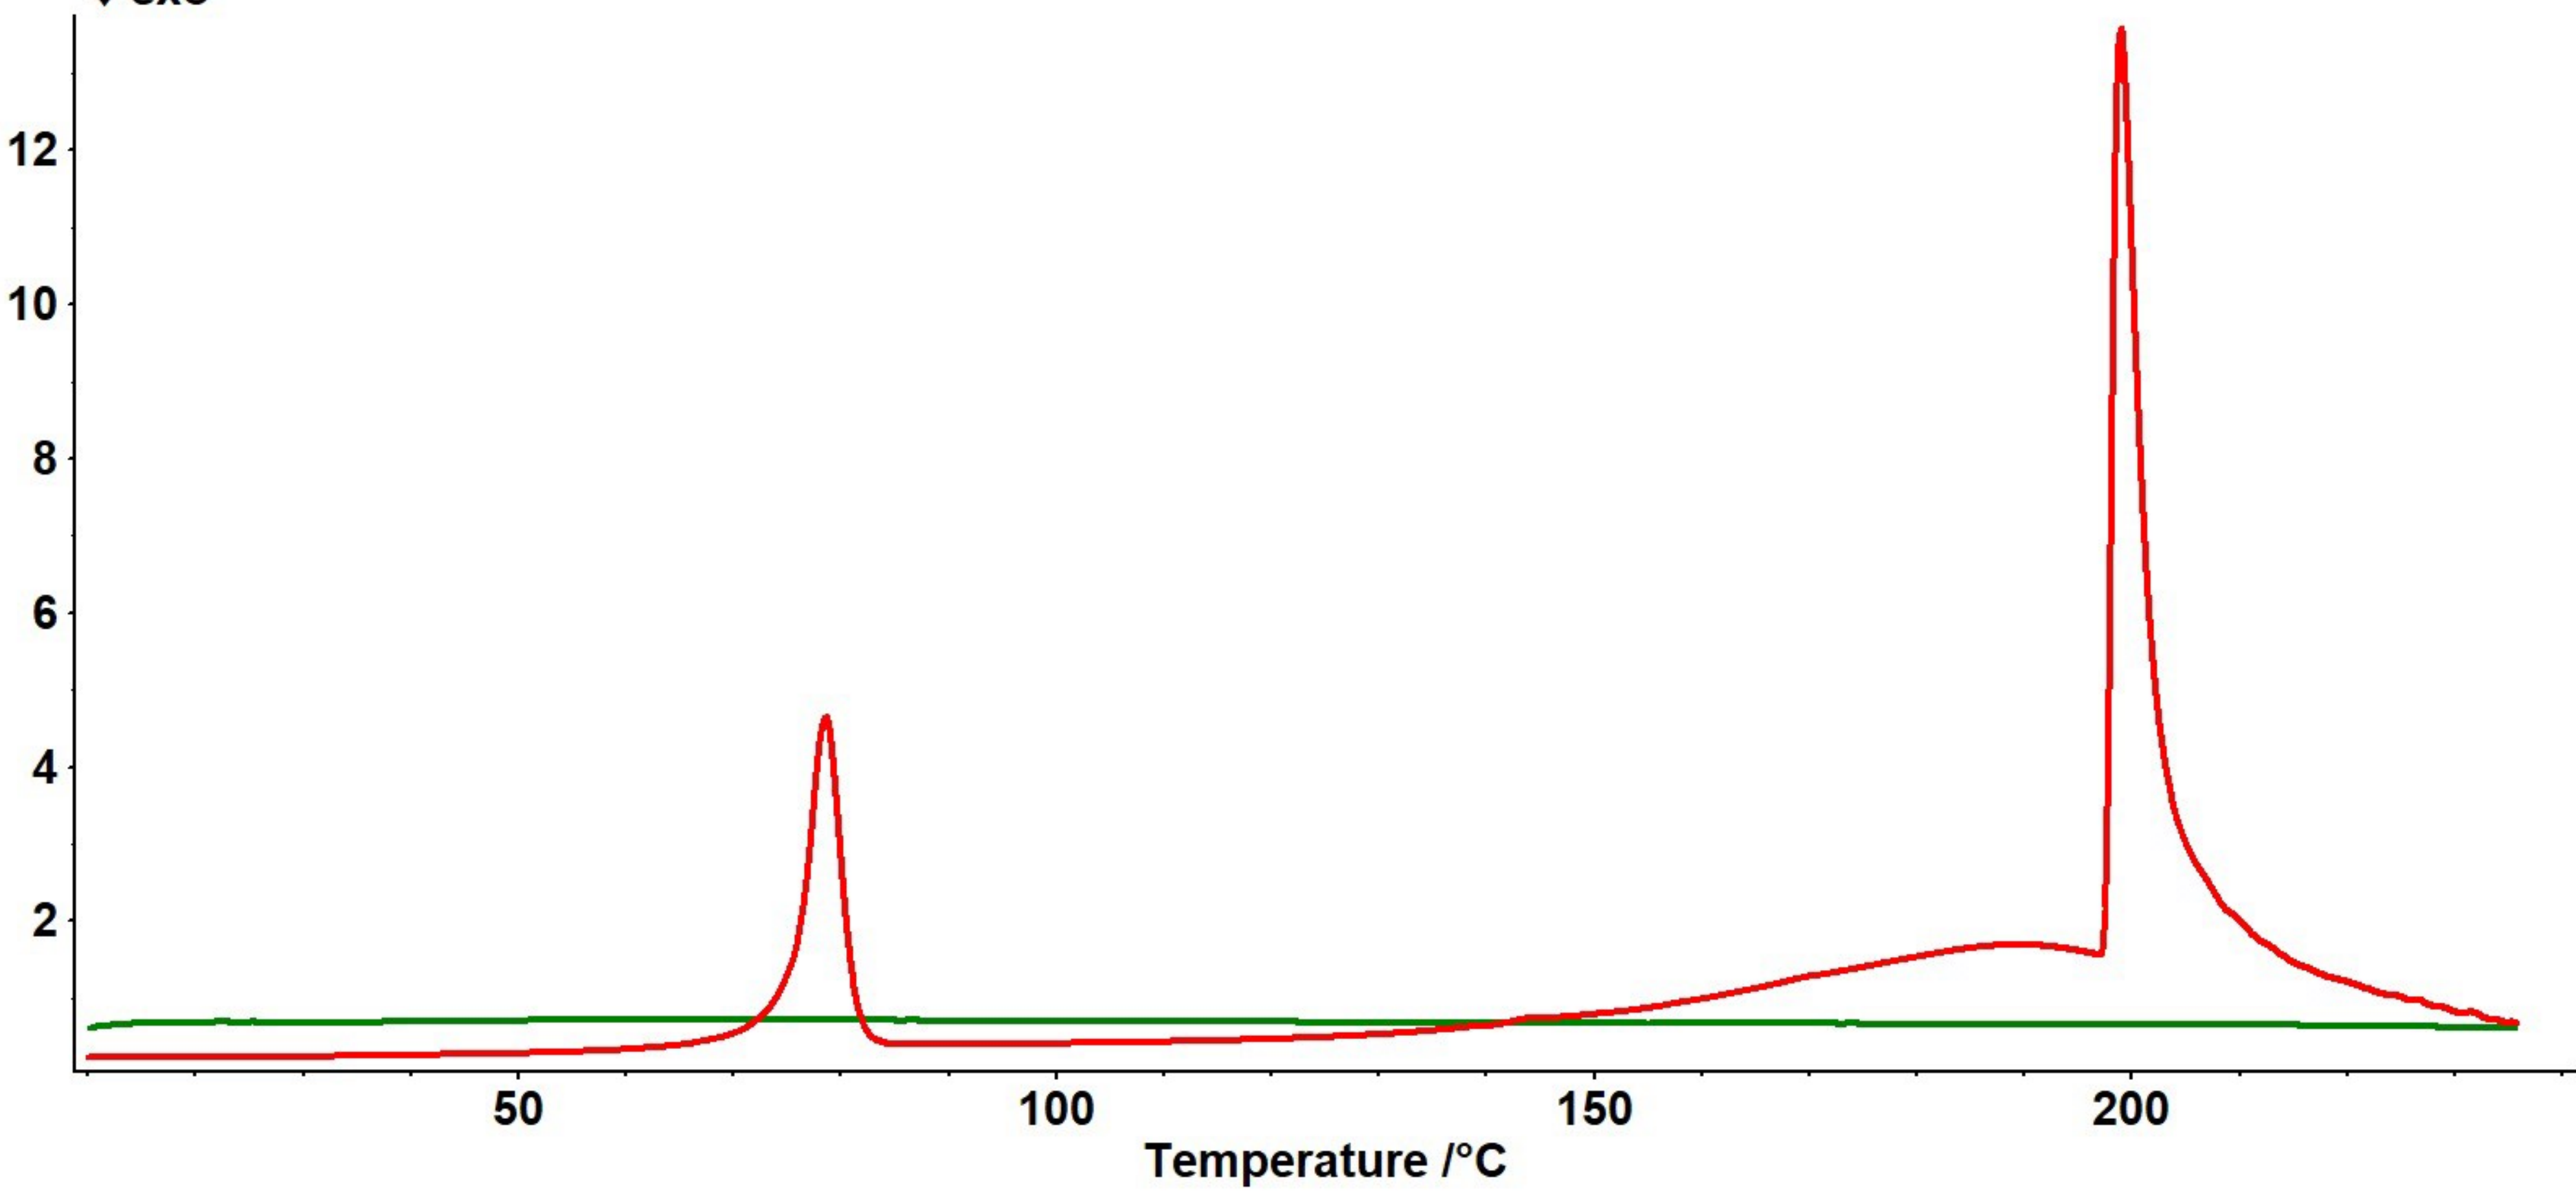

Supplement: d1ce00470k7.pdf [file d1ce00470k7.pdf]

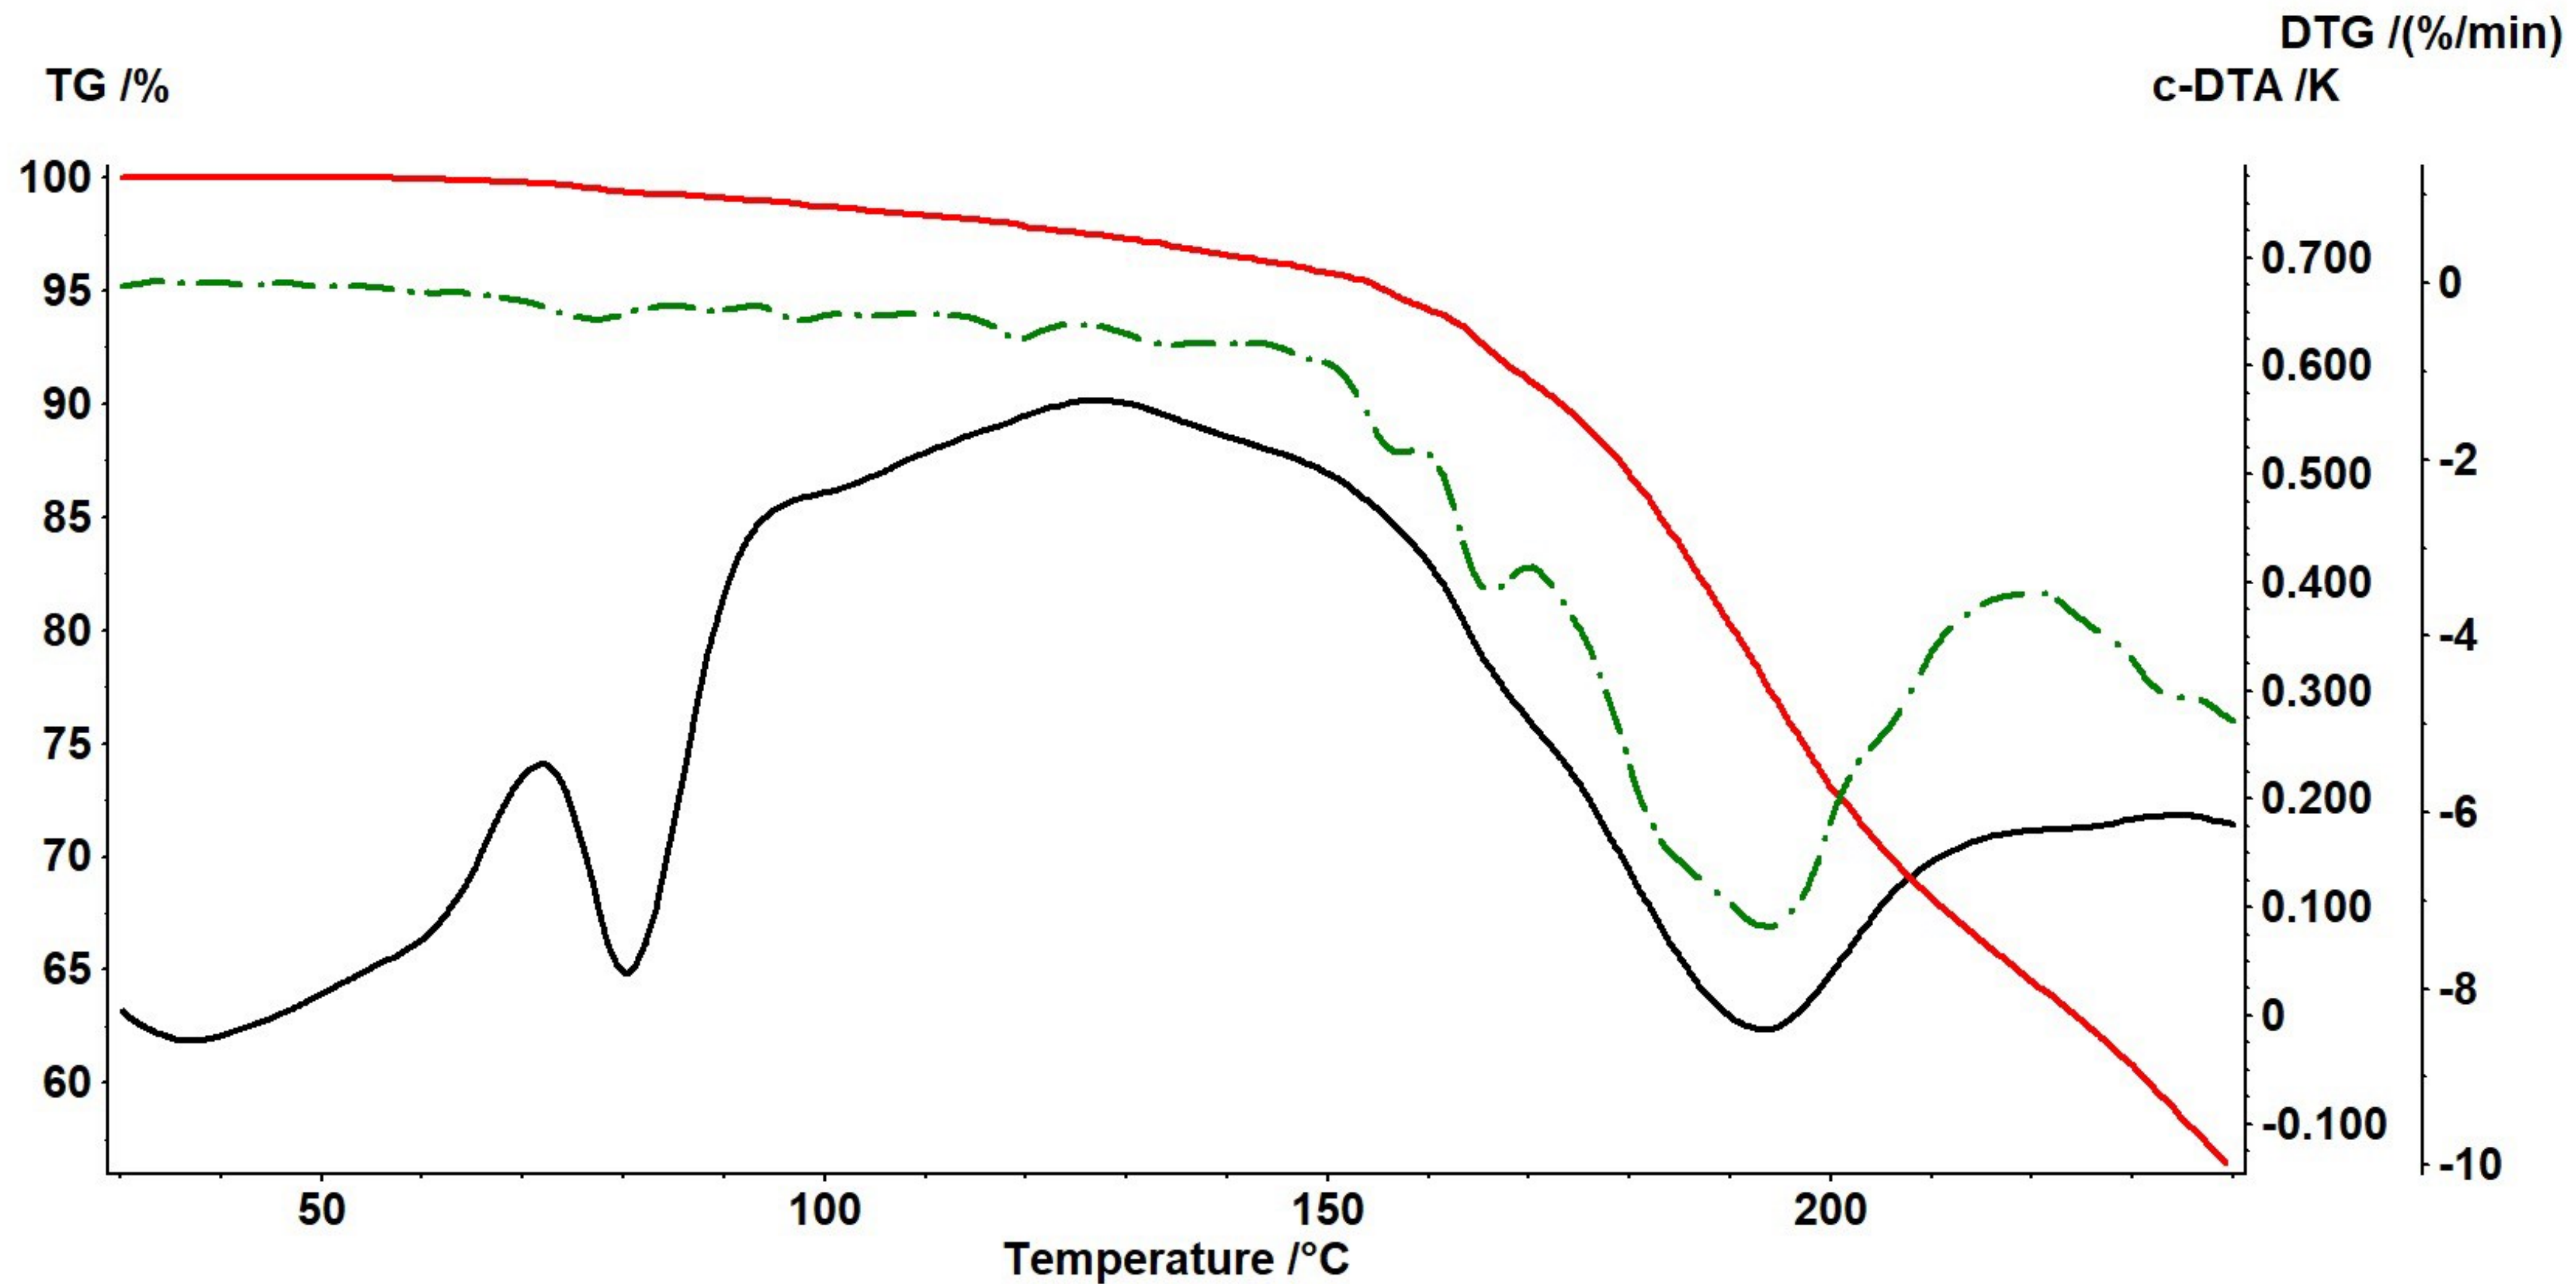

Supplement: d1ce00470k8.pdf [file d1ce00470k8.pdf]

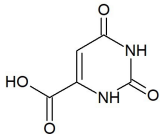

a

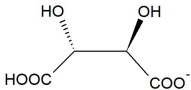

b

Supplement: d1ce00470k9.pdf [file d1ce00470k9.pdf]
